# Supplementary material
Source: publisher figshare collection journal article supplement (https://acs.figshare.com/ndownloader/files/3853825)
Supplement: Supplementary file 1 [file 3853825]

## Supporting Information

### Inhibitors of p21-Activated Kinases (PAKs)

Joachim Rudolph,<sup>†</sup> James J. Crawford,<sup>†</sup> Klaus P. Hoefflich,<sup>#</sup> Weiru Wang<sup>‡</sup>

<sup>†</sup>Discovery Chemistry, <sup>‡</sup>Structural Biology, Genentech, 1 DNA Way, South San Francisco, CA, United States

<sup>#</sup>Department of Biology, Blueprint Medicines, 215 First Street, Cambridge, MA, United States

Detailed kinase selectivity data of compounds **5**, **7**, **13**, **25**, and **28**.

Detailed kinase selectivity data of compounds **5**, **7**, **13**, **25**, and **28** (1 of 3); Source: Invitrogen.

| Compound                | 5    | 7    | 13    | 25    | 28   | Compound                | 5    | 7    | 13    | 25   | 28   |
|-------------------------|------|------|-------|-------|------|-------------------------|------|------|-------|------|------|
| Test concentration [uM] | 1    | 1    | 0.1   | 1     | 0.1  | Test concentration [uM] | 1    | 1    | 0.1   | 1    | 0.1  |
| ACVR1B                  | 1.5  | 71.3 | -0.1  | -7    | 79.3 | DCAMKL2                 |      |      | 10.9  | 23.1 |      |
| ACVR2B                  |      |      |       | -1.4  |      | DDR1                    |      |      |       | 38   |      |
| AKT1                    | 18.5 | 2    | 1.1   | -1.7  | 3.3  | DMPK                    |      |      |       | 0.4  |      |
| AKT2                    | -17  | 7    | 3.6   | 8.1   |      | DNA-PK                  |      |      | -6.3  | 6    |      |
| ALK2                    |      |      |       | 6.8   |      | DRAK1                   |      |      |       | -4.4 |      |
| ARK5                    | 95.5 | 67   |       | 60    | 85.5 | DYRK1A                  | 6    | 3    | -2    | 4.1  |      |
| ASK1                    |      |      |       | 47.2  |      | DYRK1B                  | 7    | 0    | 0.5   | 1    |      |
| Abl                     | 57.5 | 98   | -0.2  | 15    | 99.5 | DYRK3                   | 6    | -0.6 | 0.9   | 2    | 3.8  |
| Arg                     | 77   | 98   | 10.2  | 7     | 95.3 | DYRK4                   |      |      | -3    | 1.4  |      |
| Aurora_A                | 62.3 | 60   | 10.3  | 7.3   | 25.9 | EGFR                    | 4.5  | 62.3 | 2.4   | -0.6 | 38   |
| Aurora_B                | 20   | 42   | 4.7   | 22.4  |      | ERK1                    | 20   | 6    | 6.2   | 5.4  | 12.3 |
| Axl                     | 67   | 13   | 1.9   | 16.5  |      | ERK2                    | 20   | 1    | 5     | 5.4  |      |
| B-Raf                   | 35.5 | 65   | 8.2   | 11.9  | 49   | EphA1                   | 1.7  | 101  | 15    | 86.1 | 90.7 |
| B-Raf(V599E)            | 20   | 73   |       | 33    |      | EphA2                   | 18   | 93   | 9.8   | 18   | 43.5 |
| BMPR1A                  |      |      |       | -0.9  |      | EphA3                   |      |      |       | 1.2  |      |
| BTK                     | 72.5 | 84.7 | 0.8   | 5.8   | 86.3 | EphA7                   |      |      |       | 7.5  |      |
| Blk                     | 79   | 94   | 7.2   | 26.4  | 86   | EphA8                   |      |      | 0     | 65.2 |      |
| Bmx                     | 66   | 97   | 11.6  | 15.4  | 91.5 | EphB1                   | 19.1 | 96   | 100.1 | 74.5 | 93   |
| BrSK1                   |      |      | 4.6   | 8.6   |      | EphB3                   |      |      | 5.5   | 7.2  |      |
| Brk                     | 5.5  | 96.5 | 10.2  | 71.7  | 92.5 | EphB4                   | 15   | 96.5 | 5.3   | 30.6 | 78.9 |
| CAMKK1                  |      |      |       | 0.3   |      | ErbB2                   | 4    | 40   | -5    | 2.4  |      |
| CAMKK2                  |      |      |       | -2.1  |      | ErbB4                   | 2    | 84   | -1    | 1.6  | 78.9 |
| CDK1/cyclinB            | 7.5  | 4    | 8.1   | 4.4   | 16.5 | FAK                     | 38   | 32   | 3.5   | 6.8  |      |
| CDK2/cyclinA            | 22   | 0    | 1.9   | -8.1  |      | FGFR1                   | 82   | 91.5 | -4.5  | 16.9 | 83   |
| CDK5/p25                | 18   | 0    | 4.3   | 4.4   |      | FGFR2                   | 72   | 93   | 6.8   | 15   | 55.6 |
| CDK5/p35                | 17   | -1   | -1.6  | 0     |      | FGFR3                   | 31   | 68   | 7.6   | 0.5  | 45.5 |
| CDK7/cyclinH            | 98   | 6    |       | -1.4  | 31   | FGFR4                   | 11   | 39   | -1    | 4.7  |      |
| CDK8/cyclinC            | 3    | 11.5 |       | 12.4  | 57.3 | Fes                     | 43   | 93.5 | 51    | 38.7 | 38.3 |
| CDK9/cyclinT1           | 13   | -1   |       | -3.3  |      | Fgr                     |      |      | 3.6   | 10.1 |      |
| CHK1                    | 91.4 | 3    | -3.5  | -8.8  | 19.1 | Flt1                    | 6    | 58.7 | -6    | 10.8 | 18.6 |
| CHK2                    | 99   | 7    | 5.1   | 3.6   | 4.3  | Flt3                    | 77.4 | 92.3 | 8.7   | 24.9 | 83.4 |
| CK1_alpha1              |      |      | 8.8   | 1.2   |      | Flt4                    |      |      | 1     | 33.5 |      |
| CK1_delta               | 3    | 0    | 6.6   | 8.3   |      | Frk                     |      |      | 13.1  | 2.6  |      |
| CK1_epsilon1            | 3    | 75.3 | 7.3   | 79.2  | 44   | GCK                     | 8    | 71   | 1     | 55.2 | 69.8 |
| CK1_gamma1              |      |      | 1.9   | 1     |      | GRK2                    | 10   | 4    | -9.6  | 0.4  |      |
| CK1_gamma2              | 10.5 | 6.3  | 18.3  | 2.3   | -1.5 | GRK3                    | 4    | -1   | 1.1   | 0    |      |
| CK2_alpha1              | 4    | 6.7  | 5.2   | 4.3   | -3.5 | GRK5                    |      |      | 2.5   | 0.9  |      |
| CLK1                    |      |      | 11.3  | 2.6   |      | GRK6                    |      |      | 11.7  | 3.2  |      |
| CLK2                    |      |      | 0     | 21    |      | GSK3_alpha              | 51.5 | 1    | 9.7   | 4.8  | 40.6 |
| CLK3                    |      |      | 8.9   | 5.7   |      | GSK3_beta               | 77   | -1   | 4.6   | -6.1 | 11   |
| CLK4                    |      |      |       | -1.3  |      | HIPK1                   |      |      | 1.7   | 4.5  |      |
| CSF1R                   | 8.4  | 97   | 2.5   | 37.5  | 85.7 | HIPK2                   |      |      | 2.8   | 6.8  |      |
| CSK                     |      |      | 9.8   | 17.9  |      | HIPK4                   | 42   | 11   | 5     | 11.1 | 18.6 |
| CaMKI                   |      |      |       | 17.4  |      | Hyl                     |      |      | 6.6   | 4.6  |      |
| CaMKII_beta             |      |      | 11.7  | 4.8   |      | IGF1R                   | 9.5  | 9.7  | 2.9   | 5.9  | 6.5  |
| CaMKI_delta             |      |      | 6.9   | 42.7  |      | IKK_alpha               | -6   | -2   |       | 9.2  |      |
| CamKII_alpha            |      |      | -13.8 | 3.2   |      | IKK_beta                | 2.5  | 1.6  | 6.5   | -0.1 | 3.3  |
| CamKIV                  |      |      | -6.6  | 16.4  |      | IKK_epsilon             |      |      | 6     | -0.6 |      |
| Cot                     | 20.3 | 22   | 2.8   | 43.8  | 19.6 | IRAK1                   |      |      |       | 23.7 |      |
| DAPK1                   |      |      |       | -11.3 |      | IRAK4                   |      |      | 4.3   | 26.8 |      |
|                         |      |      |       |       |      | IRR                     | 14   | 13   | 7.4   | 7.3  | 14.5 |
|                         |      |      |       |       |      | InsR                    | 7    | 7    | 3.5   | 1.3  |      |

Detailed kinase selectivity data of compounds **5**, **7**, **13**, **25**, and **28** (2 of 3); Source: Invitrogen.

| Compound                | 5    | 7    | 13    | 25   | 28   | Compound                | 5     | 7    | 13    | 25   | 28   |
|-------------------------|------|------|-------|------|------|-------------------------|-------|------|-------|------|------|
| Test concentration [uM] | 1    | 1    | 0.1   | 1    | 0.1  | Test concentration [uM] | 1     | 1    | 0.1   | 1    | 0.1  |
| Itk                     | 23   | 7    | 4     | -1.4 |      | PAK1                    | 95    | 103  | 2.1   | 99.7 | 97.5 |
| JAK1                    | 2    | -2   | 0.1   | 2    |      | PAK2                    | 85.5  | 98   | 14.9  | 104  | 97.7 |
| JAK2                    | 9.4  | 39.3 | 3.4   | -1.8 | 50.3 | PAK3                    | 86    | 91.8 | 3.3   | 96.1 | 92.6 |
| JAK3                    | 9    | 39.7 | -1.3  | -4.3 | 45.4 | PAK4                    | 98.5  | 16   | 89.5  | 5.1  | 29.2 |
| JNK1_alpha1             | 9    | 57.7 | 4.1   | 58.5 | 51   | PAK5                    | 100   | 20.3 | 75.1  | 8.2  | 28.5 |
| JNK2                    | -1.5 | 13.7 | -1    | 33.9 | 14.8 | PAK6                    | 99.6  | 24.3 | 49.9  | 22.2 | 21.8 |
| JNK3                    | 5.5  | 15.3 | 2.7   | 31.5 | 2.3  | PASK                    |       |      | 15.9  | 3.2  |      |
| KDR                     | 20   | 94.3 | -3.1  | 14.7 | 72.2 | PDGFR_alpha             | 2     | 76   | -3.5  | 7.8  | 66.9 |
| KHS1                    | 55   | 106  | -5.1  | 102  | 105  | PDGFR_alpha(V561D)      | 23    | 98   |       | 14.9 | 96   |
| Kit                     | 7    | 68   | -5.5  | 3.4  | 37   | PDGFR_beta              | 14    | 57   | 0.7   | 2    |      |
| LIMK1                   | -5   | 93.5 |       | 40.5 | 42.4 | PKD1(direct)            | 80.3  | 43.3 | 13.7  | 7    | -6   |
| LRRK2                   | 16.8 | 48   |       | -6.9 | 48.2 | PI3K-A                  | -5    | 6    |       | -3.5 |      |
| LTK                     |      |      | -0.9  | -1.8 |      | PI3K-G                  | -10.5 | 14.7 |       | -5.2 | 4.1  |
| Lck                     | 46.5 | 103  | 7.6   | 85.8 | 97.5 | PI3K-C2b                | 8     | 19   |       | 2    |      |
| Lyn                     | 76   | 98   | -2.7  | 35.2 | 97.5 | PI3K-D                  |       |      | -4.8  |      |      |
| LynB                    | 79   | 101  | 11.1  | 34   | 99.8 | PIM1                    | 6     | 2    | 3.8   | -1.4 | -2   |
| MAP4K4                  | 17.1 | 101  | 14.6  | 58.7 | 104  | PIM2                    | 4     | 0    | 8.4   | 3    |      |
| MAPKAPK2                | 3    | 2    | 3.9   | -3.8 |      | PKA                     | 103   | 2    | -2.6  | 1.6  | 13   |
| MAPKAPK3                |      |      | 4.8   | -0.4 |      | PKC_alpha               | 78    | 11.5 | -12.8 | 21.4 | 11.4 |
| MARK1                   | 88.6 | 12.5 | 11.3  | 19.3 | 25.8 | PKC_beta1               | 58    | 2    | 0.5   | 12.5 |      |
| MARK3                   | 100  | 15   | 5.5   | 19.6 | 37   | PKC_delta               |       |      | 8.3   | 13.7 |      |
| MEK1                    | 36.5 | 29   | 2.5   | 24.4 | 23.8 | PKC_epsilon             | 62    | 11   | -13.2 | 18.7 |      |
| MEK2                    | 20   | 73   | -0.6  | 15   |      | PKC_eta                 |       |      | 12.3  | 14.3 |      |
| MEK3                    |      |      |       | 17   |      | PKC_theta               | 97    | 2    | 22.8  | 20.1 | 17   |
| MEKK2                   |      |      |       | 32.7 |      | PKC_zeta                |       |      | 16.4  | 22.9 |      |
| MELK                    |      |      | 4.1   | 47.1 |      | PKD1                    | 94    | 71.5 | 9.3   | 78.7 | 49.5 |
| MKK6                    |      |      | -11.4 | 7.1  |      | PKG1_alpha              |       |      | -2    | -1.5 |      |
| MKNK1                   |      |      | -2.7  | -4   |      | PLK1                    | 35    | 2    | 10.8  | 4.3  |      |
| MKNK2                   |      |      |       | 36.7 |      | PLK2                    |       |      | 9.2   | 4.3  |      |
| MLK1                    | 53   | 86   | 15.4  | 9.2  | 11.4 | PLK3                    | 18.5  | -7.3 | 5     | -4.4 | -5.8 |
| MLK2                    |      |      |       | 14.8 |      | PRAK                    |       |      | -2.3  | 5.2  |      |
| MRCK_alpha              |      |      | -2.4  | 8.6  |      | PRK1                    | 68    | 5    | 10.6  | 11.5 | -1.6 |
| MSK1                    |      |      | 4.2   | 15.6 |      | PRKAA1                  | 101   | 32.7 | 12.5  | 8.5  | 16   |
| MSSK1                   |      |      | 9.8   | 7.1  |      | PRKAA2                  | 100   | 55   |       | 17   | 8.3  |
| MST1                    | 88   | 33.5 | -5.1  | 30   | 63.7 | PhK_gamma1              | 95.9  | 13   | 3.2   | 4.7  | -4.8 |
| MST2                    |      |      | 8.8   | 17   |      | PhK_gamma2              |       |      | 17.3  | 7.7  |      |
| MST3                    | 101  | 31.3 | 5.9   | 100  | 70.2 | PrKX                    |       |      | 5.3   | 15.6 |      |
| MST4                    | 96   | 19   | -1.5  | 96   | 82   | RAF1(Y340D,Y341D)       | 22.5  | 63.3 | 7.6   | 10.4 | 18.4 |
| MYLK(smMLCK)            |      |      |       | 8.3  |      | RIPK2                   | 4.5   | 99   |       | 59.5 | 101  |
| MYLK2(skMLCK)           | 30   | 50.8 | 8.2   | 28   | 25.5 | ROCK1                   | 5     | -1   | 0.8   | -1.4 |      |
| MYLK3(caMLCK)           |      |      |       | 1.7  |      | ROCK2                   | 10    | 2    | 0.5   | 5.8  |      |
| Mer                     | 92   | 72.5 | 2.6   | 26.1 | 53.8 | Ret                     | 81    | 98   | 4.4   | 7    | 92.1 |
| Met                     | 19   | 61   | 4.4   | 31.8 | 13.3 | Ron                     | 8     | 79   | 0.3   | 49.2 | 6    |
| Mink1                   | 5.2  | 89.8 | -2.8  | 65.7 | 97   | Ros                     |       |      | 6.8   | 6.2  |      |
| MuSK                    |      |      | 0.3   | 16.9 |      | Rse                     |       |      | 1.4   | 47.5 |      |
| NEK1                    | 2    | 9    | 8.1   | 4.2  | 1.5  | Rsk1                    |       |      | 6.7   | 15.4 |      |
| NEK2                    | 8    | 72   | 6.3   | 10   |      | Rsk2                    | 105   | 6    | 11.7  | 9.2  | -6   |
| NEK4                    |      |      | 2     | 3.8  |      | Rsk3                    | 101   | 15.5 | 14.9  | 25.6 | 11.9 |
| NEK6                    |      |      | 9.9   | 7.7  |      | Rsk4                    | 100   | 10.5 | 2.4   | 8.6  | 19.5 |
| NEK9                    | 11   | 4.5  | 1.6   | 1.6  | -0.9 | SGK1                    |       |      | 4.4   | -1.3 |      |
| NIK                     |      |      | -0.5  |      |      | SGK2                    |       |      | -2.9  | 18   |      |
| NLK                     | 12.2 | 77.9 |       | 44.6 | 5    | SGK3                    | 47    | 3    | 9.3   | 17.6 | 2.2  |

Detailed kinase selectivity data of compounds **5**, **7**, **13**, **25**, and **28** (3 of 3); Source: Invitrogen.

| Compound                | <b>5</b> | <b>7</b> | <b>13</b> | <b>25</b> | <b>28</b> |
|-------------------------|----------|----------|-----------|-----------|-----------|
| Test concentration [uM] | 1        | 1        | 0.1       | 1         | 0.1       |
| SIK2                    | 68       | 98.3     | 0.8       | 88.7      | 96.3      |
| SLK                     |          |          |           | 9.3       |           |
| SPHK1                   | 4        | 4        |           | 2.8       |           |
| SRPK1                   |          |          | 5.4       | 4.1       |           |
| STK16                   |          |          |           | 27.5      |           |
| STK33                   |          |          |           | 18.1      |           |
| Src                     | 87.6     | 94.3     | 1.9       | 26.5      | 92.9      |
| Srm                     |          |          | 11.1      | -7.7      |           |
| Syk                     | 15.1     | 53.3     | 4.3       | 1.6       | 37.1      |
| TAK1-TAB1               | 38.2     | 15.5     | -11       | 0.2       | 27.9      |
| TAO1                    | 5.5      | 98.5     | -0.2      | 81        | 91.5      |
| TBK1                    | 45       | 34       | 11.6      | 5.3       | 4.3       |
| TEC                     |          |          |           | 2.9       |           |
| TGFBR1                  | -1       | 95.5     |           | 3.1       | 99.3      |
| TNK2                    |          |          |           | 1.4       |           |
| TSSK1                   | 90       | 10       | 6.2       | 9.6       | 28        |
| TTK                     |          |          |           | 12.6      |           |
| TXK                     |          |          | 5.1       | 5.5       |           |
| TYK2                    | 14       | 47       | 3.3       | 4.8       |           |
| Tie2                    | 0        | 96       | 2.1       | 80.8      | 24.8      |
| TrkA                    | 83.7     | 91       | 9         | 25.5      | 51.6      |
| TrkB                    |          |          | 15.1      | 6.9       |           |
| WEE1                    |          |          |           | -1.2      |           |
| WNK2                    |          |          |           | 43.6      |           |
| YSK1                    | 97       | 9.8      | 6.5       | 96.3      | 63.9      |
| Yes                     | 86       | 99       | -1.4      | 14.6      | 98        |
| ZAK                     |          |          |           | 15.1      |           |
| ZAP-70                  | 10       | 9        | 2.4       | 3         | 4.5       |
| ZIPK                    |          |          | 2.9       | 3.9       |           |
| eEF-2K                  |          |          | 4.3       | 10.3      |           |
| mTOR                    | -3       | -8       | -2.4      | -0.5      |           |
| p38_alpha(direct)       | 7        | 13.3     | 4.4       | -2.6      | 34.8      |
| p38_beta                | 8        | 10       | -6.4      | 5.6       |           |
| p38_delta               | 13       | 0        | 8.4       | 9.6       | 5.1       |
| p38_gamma               |          |          | 8.1       | 14.2      |           |
| p70S6K                  | 79.2     | 2        | 7.2       | 7.5       | 15.3      |
